# Supplementary material for: Repetitive ischemic injuries to the kidneys result in lymph node fibrosis and impaired healing
Source: JCI journal article supplement (doi:10.1172/jci.insight.120546), 2018-07-11

## **Repetitive ischemic injuries to the kidneys result in lymph node fibrosis and impaired healing**

Omar H. Maarouf<sup>1,2#</sup>, Mayuko Uehara<sup>1#</sup>, Vivek Kasinath<sup>1</sup>, Zhabiz Solhjou<sup>1</sup>, Naima Banouni<sup>1</sup>, Baharak Bahmani<sup>1</sup>, Liwei Jiang<sup>1</sup>, Osman A. Yilmam<sup>1</sup>, Indira Guleria<sup>1</sup>, Scott B. Lovitch<sup>3</sup>, Jane L. Grogan<sup>4</sup>, Paolo Fiorina<sup>5</sup>, Peter T. Sage<sup>1</sup>, Jonathan S. Bromberg<sup>6</sup>, Martina M. McGrath<sup>1</sup>, and Reza Abdi<sup>1\*</sup>

1. Transplantation Research Center, Renal Division, Brigham and Women's Hospital, Harvard Medical School, Boston, MA, USA.

2. Renal Division, Thomas Jefferson University Hospital, Philadelphia, USA

3. Department of Pathology, Brigham and Women's Hospital, Harvard Medical School, Boston, MA, USA.

4. Genentech, Inc., South San Francisco, CA, USA.

5. Nephrology Division, Boston Children's Hospital, Harvard Medical School, Boston, MA, USA.

6. Department of Surgery, University of Maryland School of Medicine, Baltimore, MD, USA

# Omar H. Maarouf and Mayuko Uehara have contributed equally to this work: Co-authors.

\* Address correspondence to:

Reza Abdi, MD

Transplant Research Center, Brigham and Women's Hospital

221 Longwood Ave, Boston MA 02115, USA

Tel: 617-732-5259, Fax: 617-732-5254

E-mail: [rabdi@rics.bwh.harvard.edu](mailto:rabdi@rics.bwh.harvard.edu)

## Supplementary Figure legend

### Supplementary Figure 1. Acute effects of IRI on the kidney and KLN

A) Live image of KLN following injection of India ink (black arrow). B) CFSE-labeled CD4<sup>+</sup> T cells injected into Rag1<sup>-/-</sup> mice preferentially enter and proliferate within the KLN draining ischemic kidney (KLN: IRI<sup>(D2)</sup>), in comparison to contralateral KLN draining non-ischemic kidney (KLN: Ctrl) and naïve KLN (KLN: Naïve). C) H&E staining of kidney section shows mild tubular injury 2 days following IRI (kidney: IRI<sup>(D2)</sup>). 30 days following IRI, histologic signs of renal injury have resolved (kidney: IRI<sup>(D30)</sup>) by H&E and Masson's Trichrome stains. (Scale bar = 75µm.) D) A single episode of IRI leads to prolonged changes in KLN. Sustained increases in ER-TR7, fibronectin, αSMA and Collagen I signals are present 30 days following IRI. A persistent increase in macrophage density is seen 30 days following IRI. Regression of lymphatic endothelium is sustained 30 days following IRI. Representative data of mean fluorescent signal (n=3-4/group, mean ± SEM, student *t*-test; \**p*<0.05). E) Increased staining for Collagen I and F4/80<sup>+</sup> macrophages are seen in KLN both 2 days (KLN: IRI<sup>(D2)</sup>) and 30 days (KLN: IRI<sup>(D30)</sup>) following IRI, in comparison to KLN draining kidney without IRI (KLN: Ctrl). Senescence of cells in KLN does not increase following IRI, as assessed by p16<sup>INK4A</sup> staining. Decreased Lyve1 signal indicates progressive lymphatic endothelial network regression by 30 days following IRI. (Scale bar = 200µm for ColI+F4/80, 100µm for p16<sup>INK4A</sup> and Lyve1.)

### Supplementary Figure 2. Repetitive IRI results in inflammation and fibrosis of kidney and KLN

A) H&E and Masson's trichrome stains of kidney tissue following repetitive IRI show interstitial fibrosis. (Scale bar = 75µm.) B) Gene expression of kidney tissue shows significant increase in

pro-inflammatory cytokines and markers of fibrosis following repetitive IRI (n=3/group, mean  $\pm$  SEM, student's *t*-test, \**p*<0.05, \*\**p*<0.01). C) Gene expression of KLN tissue shows significant increase in markers of fibrosis and macrophages following repetitive IRI (n=3/group, mean  $\pm$  SEM, student's *t*-test, \**p*<0.05, \*\**p*<0.01).

### **Supplementary Figure 3. DT administration shows no morphologic changes in kidney**

A) No structural change in the glomeruli or tubules was noted in H&E staining of CCL19<sup>Cre</sup><sub>x</sub> iDTR kidney tissue following DT administration. (Scale bar = 75 $\mu$ m.) B) PDPN and megalin staining of CCL19<sup>Cre</sup><sub>x</sub> iDTR kidney tissue shows intact glomeruli and tubules following DT administration. (Scale bar = 50 $\mu$ m.) C) As compared to KLN, the expression of CCL19 was almost undetectable in podocytes (n=4/group, mean  $\pm$  SEM, student's *t*-test, \*\*\**p*<0.01).

**A**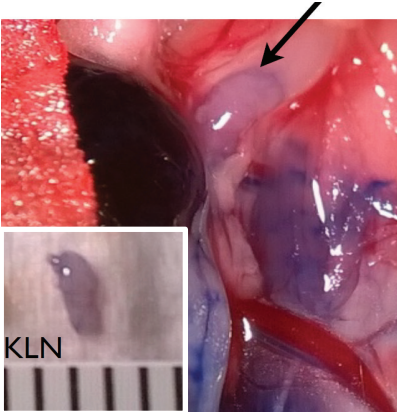**B**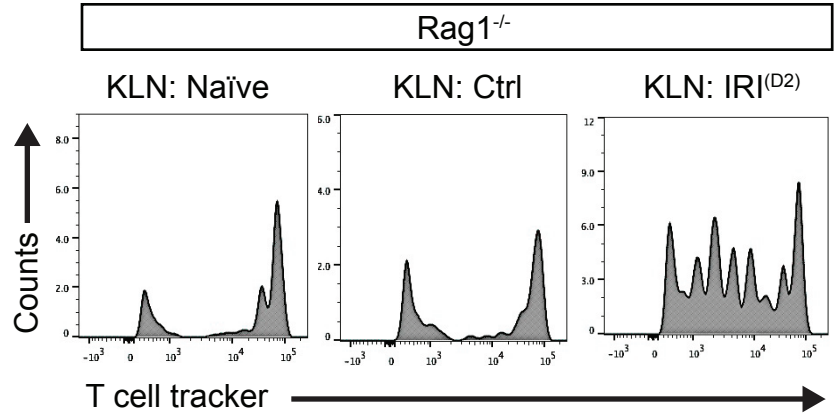**C**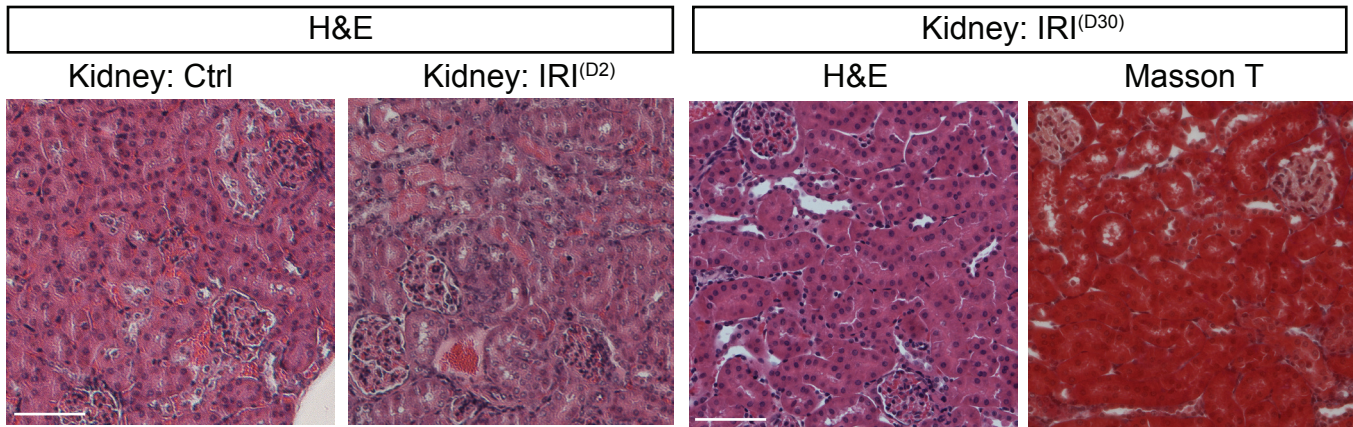**D**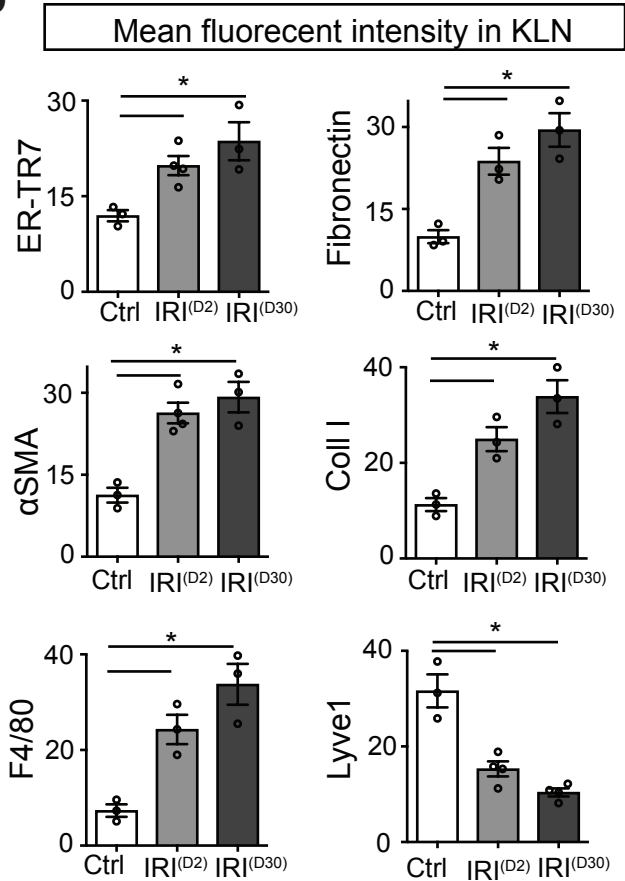**E**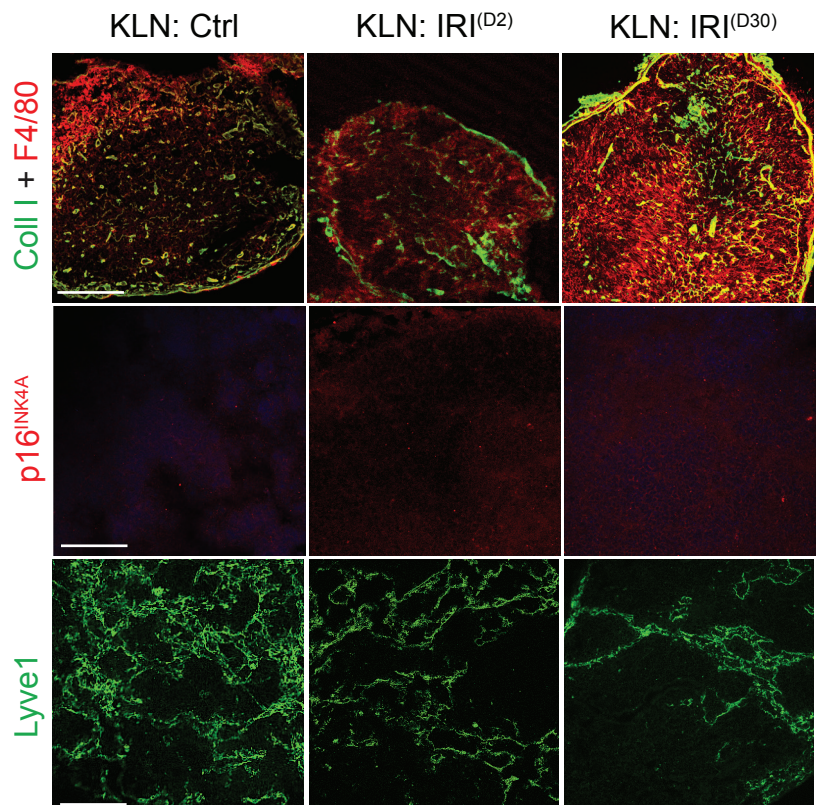

**A**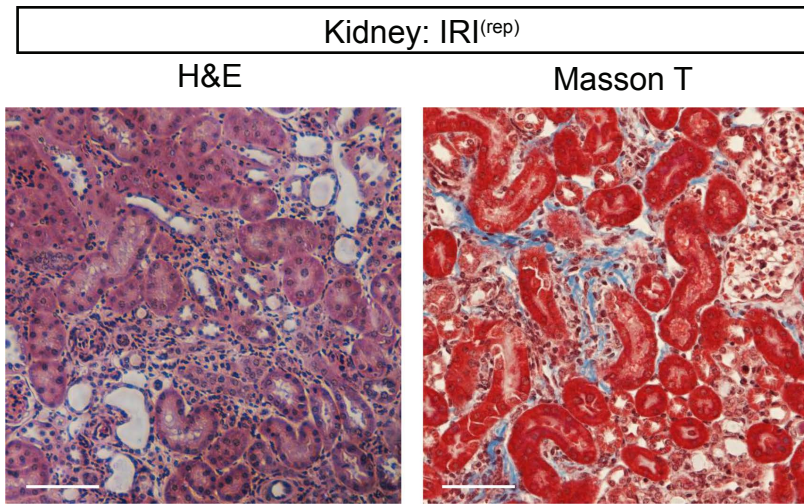**B**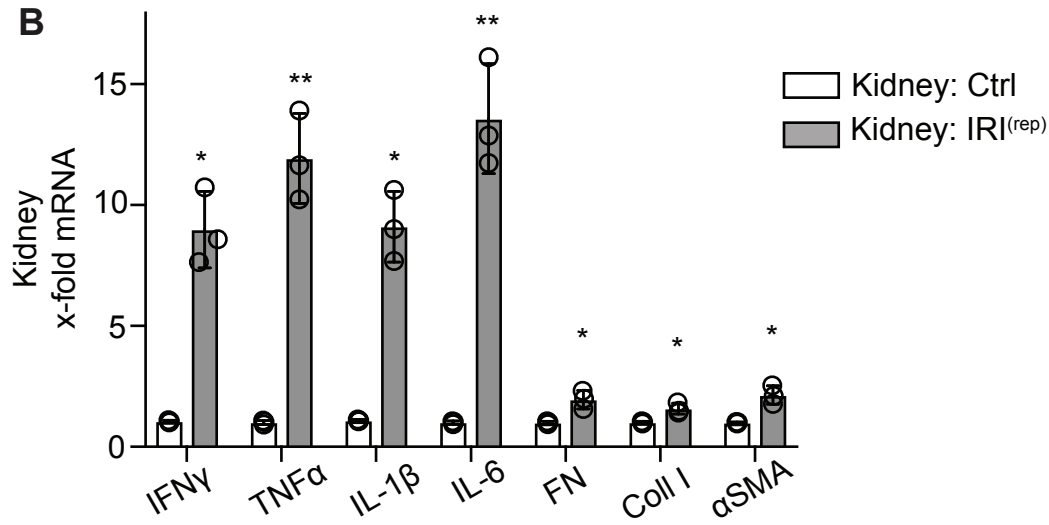**C**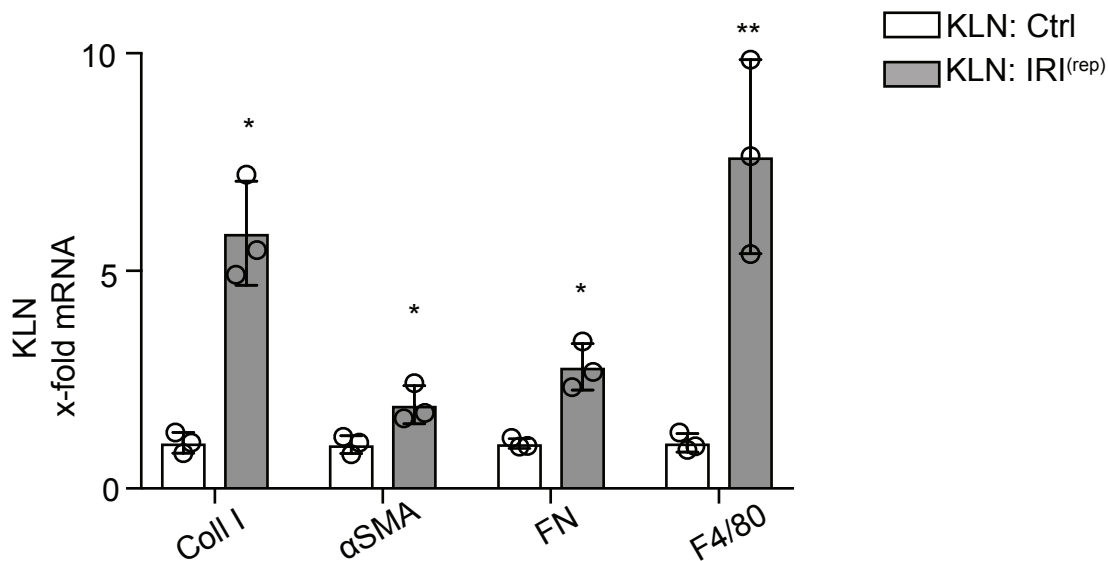

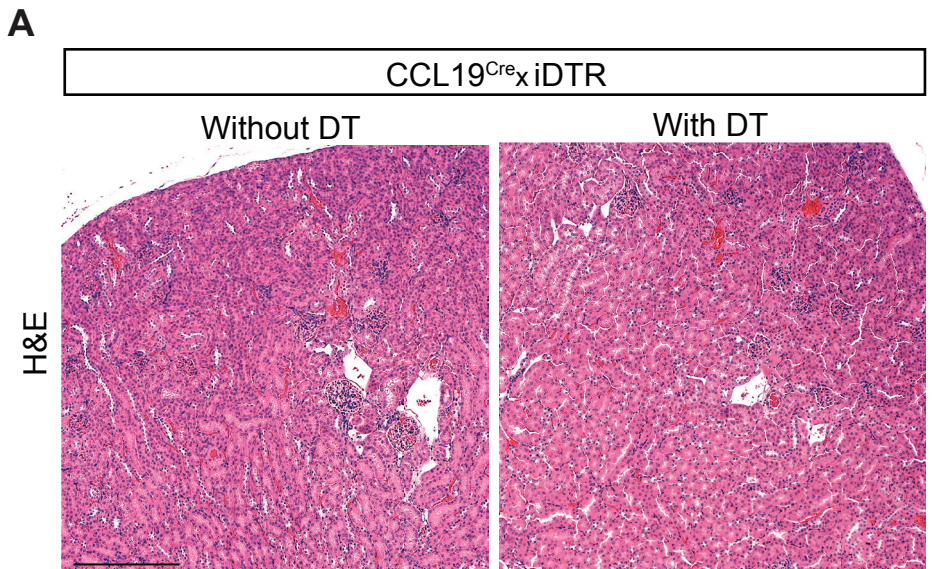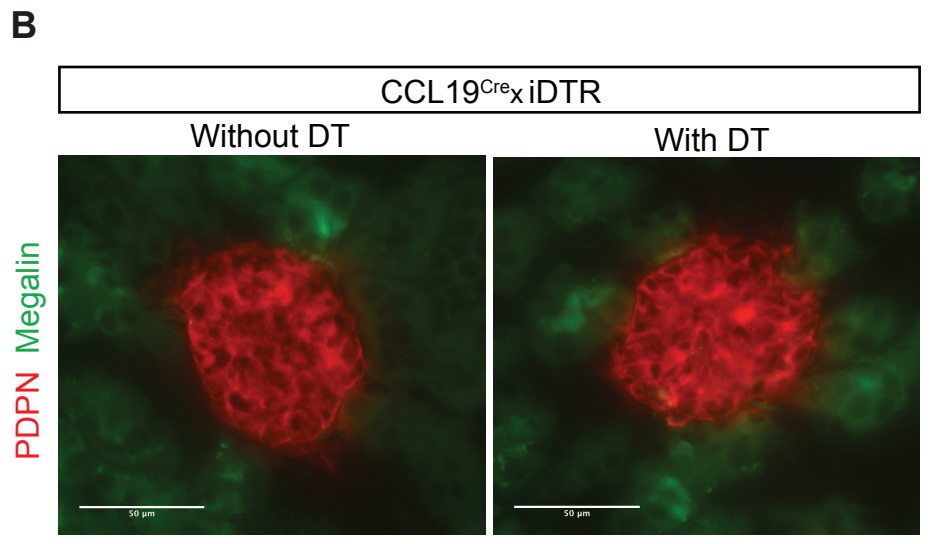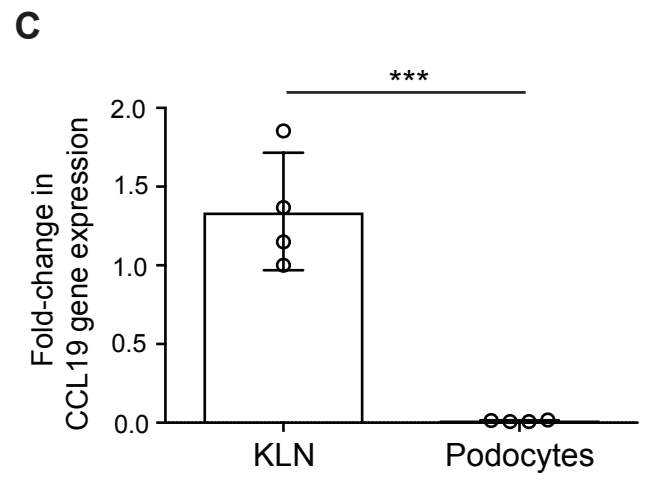

Supplement: sd1 [file 1]
